1  
2  
3  
4  
5  
6  
7  
8  
9  
10  
11  
12  
13  
14  
15  
16  
17  
18  
19  
20  
21  
22  
23  
24  
25  
26  
27  
28  
29  
30  
31  
32

**MBE**  
Article  
*Discovery*

**Adaptive landscape of protein variation in human exomes**

Ravi Patel<sup>1,2</sup>, Maxwell D. Sanderford<sup>1</sup>, Tamera R. Lanham<sup>1</sup>, Koichiro Tamura<sup>3</sup>, Alexander Platt<sup>1,2</sup>, Benjamin S. Glicksberg<sup>4</sup>, Ke Xu<sup>4</sup>, Joel T. Dudley<sup>4</sup>, and Laura B. Scheinfeldt<sup>1,2,5,\*</sup> and Sudhir Kumar<sup>1,2,6,\*</sup>

<sup>1</sup>Institute for Genomics and Evolutionary Medicine, Temple University, Philadelphia, USA

<sup>2</sup>Department of Biology, Temple University, Philadelphia, USA

<sup>3</sup>Department of Biology, Tokyo Metropolitan University, Tokyo, Japan

<sup>4</sup>Department of Genetics and Genomic Sciences, Icahn School of Medicine at Mount Sinai, New York, USA

<sup>5</sup>Coriell Institute for Medical Research, Camden, USA

<sup>6</sup>Center for Excellence in Genome Medicine and Research, King Abdulaziz University, Jeddah, Saudi Arabia

\*Authors contributed equally to this work

Corresponding Author:

Sudhir Kumar  
SERC Building (602)  
1925 N. 12 Street  
Philadelphia, PA 19122, USA  
623-225-5230  
[s.kumar@temple.edu](mailto:s.kumar@temple.edu)

33 **Abstract**

34

35 The human genome contains hundreds of thousands of missense mutations. However, only  
36 a handful of these variants are known to be adaptive, which implies that adaptation through  
37 protein sequence change is an extremely rare phenomenon in human evolution.  
38 Alternatively, existing methods may lack the power to pinpoint adaptive variation. We have  
39 developed and applied an Evolutionary Probability Approach (EPA) to discover candidate  
40 adaptive polymorphisms (CAPs) through the discordance between allelic evolutionary  
41 probabilities and their observed frequencies in human populations. EPA reveals thousands  
42 of missense CAPs, which suggest that a large number of previously optimal alleles had  
43 experienced a reversal of fortune in the human lineage. We explored non-adaptive  
44 mechanisms to explain CAPs, including the effects of demography, mutation rate  
45 variability, and negative and positive selective pressures in modern humans. Our analyses  
46 suggest that a large proportion of CAP alleles have increased in frequency due to beneficial  
47 selection. This conclusion is supported by the facts that a vast majority of adaptive  
48 missense variants discovered previously in humans are CAPs, and that hundreds of CAP  
49 alleles are protective in genotype-phenotype association data. Our integrated  
50 phylogenomic and population genetic EPA approach predicts the existence of thousands of  
51 signatures of non-neutral evolution in the human proteome. We expect this collection to be  
52 enriched in beneficial variation. EPA approach can be applied to discover candidate  
53 adaptive variation in any protein, population, or species for which allele frequency data  
54 and reliable multispecies alignments are available.

55

56 **Keywords:** adaptation, evolution, missense

## 57 **Introduction**

58 Over half a million missense variants have been identified in human populations, of which  
59 a substantial number occurs at significant frequency ( $> 1\%$ ; 33,369 missense variants)  
60 (1000 Genomes Project Consortium 2015). While previous studies have shown the  
61 potential for ample adaptive coding variation in the human genome (Boyko et al. 2008;  
62 Enard et al. 2014), they have pinpointed only a few missense polymorphisms to be adaptive  
63 (Grossman et al. 2013; Hernandez et al. 2011) (**Table 1**). It is possible that virtually all of  
64 the common human missense polymorphisms are either selectively neutral or deleterious  
65 (i.e., subject to purifying selection), but an alternative explanation is that existing methods  
66 lack sufficient power to locate adaptive coding variation. Furthermore, population genomic  
67 approaches to date are typically designed to identify recent selective pressures acting on  
68 candidate genes or genetic regions that vary within modern human populations, a segment  
69 of time that is only a minor fraction of the depth of the human lineage. We, therefore, have  
70 the opportunity to discover thousands of novel adaptive changes by using complementary  
71 approaches.

72 In this article, we integrate phylogenomics and population genomics to discover  
73 candidate adaptive polymorphisms and apply it to the human exome. Our approach  
74 advances beyond the current phylogenetic methods that compare patterns across species,  
75 but are blind to variation segregating within a given species (Anisimova and Yang 2007;  
76 Goldman and Yang 1994; Hurst 2002; Lindblad-Toh et al. 2011; Muse and Gaut 1994;  
77 Nielsen et al. 2005; Peter et al. 2012; Pollard et al. 2006; Shapiro and Alm 2008; Yang and  
78 Bielawski 2000). It is also distinct from the current population genomic methods that utilize  
79 within-population variation to identify candidate adaptive genes or genetic regions, but do  
80 not distinguish specific amino acid variants (Akey 2009; Akey et al. 2002; Grossman et al.  
81 2013; Li and Stephan 2006; Moon and Akey 2016; Sabeti et al. 2007; Teshima et al. 2006;  
82 Voight et al. 2006). We applied this new approach to over 500,000 polymorphic missense  
83 alleles (1000 Genomes Project Consortium 2015) reported in human proteins, which  
84 revealed over 18,000 variants that exhibit non-neutral evolutionary patterns. We explored  
85 a wide variety of non-adaptive phenomena to explain the existence of these variants and  
86 investigated available genotype-phenotype association studies to determine if the non-  
87 neutral variants revealed by our new approach have had significant impact on human

88 phenotypic variation.

89

## 90 **New Approaches**

91 Our approach exploits the neutral theory framework, where variation arising from long-  
92 term molecular evolution among species informs a null model of observed within-species  
93 patterns of selectively neutral variation (i.e., no fitness effect) (Kimura 1983). This  
94 relationship is useful to identify adaptive proteins that deviate from neutral expectations  
95 and have undergone adaptive evolution (Hudson et al. 1987; McDonald and Kreitman  
96 1991). In our novel allelic approach, we first capture long-term evolutionary history with  
97 estimates of the neutral evolutionary probability (EP) of observing each of the possible 20  
98 segregating amino acid residue alleles at a given amino acid position. EP is computed using  
99 a Bayesian framework and a multispecies alignment; it is an average of posterior  
100 probabilities weighted by the divergence time of each of the species relative to humans in  
101 the species timetree used (Liu et al. 2016). The sum of all allelic EPs is 1.0 for each amino  
102 acid position. Importantly, EP for an amino acid allele at a given protein position is not  
103 affected by the presence of a consensus base at that position in the human reference genome  
104 or by the corresponding alleles that segregate in humans, because this information is  
105 excluded from the multispecies alignment when EP is calculated (Liu et al. 2016). EP of  
106 an allele at a given position is, therefore, completely independent of intra-specific variation.  
107 Under neutral theory, residue alleles with low EP ( $< 0.05$ ) are not expected to persist within  
108 populations and are, therefore, predicted to impact function and fitness (Liu et al. 2016).  
109 Indeed, less than 1% of simulated neutral EPs fall below 0.05 in computer simulations,  
110 where we used the 46 species time tree in **Fig. 1a**, branch lengths from UCSC (Kent et al.  
111 2002; Liu et al. 2016; Murphy et al. 2001; Siepel and Haussler 2005), and pyvolve  
112 (Spielman and Wilke 2015) to simulate amino acid sequences (see **Methods**).

113 Therefore, EP can serve as a null expectation that predicts the neutral probability of  
114 observed within-species variation. Contrasting the former against the latter produces a  
115 direct neutrality comparison, e.g., non-neutral residue alleles with low EP ( $< 0.05$ ) are  
116 expected to correspond to missense mutations that are found at low allele frequencies (AFs)  
117 due to purifying selection (Liu et al. 2016). Consistent with this expectation, 91% of  
118 disease-associated missense variants in HumVar (Adzhubei et al. 2010) have low EP ( $<$

119 0.05) and low AF (< 1%). More generally, EP shows agreement with observed global AFs  
120 calculated from the 1000 Genomes data (**Fig. 1b**;  $R^2 = 0.83$ ,  $P < 10^{-15}$ ).

121 We used the above considerations to build an Evolutionary Probability Approach (EPA)  
122 to identify non-neutral (EP < 0.05) alleles that occur with unexpectedly high population  
123 AF. When applied to protein sequence variation, such alleles will likely impact protein  
124 function, and their prevalence may be due to adaptive pressures. Therefore, we refer to  
125 them as candidate adaptive polymorphisms (CAPs). An observed allele is designated a CAP,  
126 if it has an EP < 0.05 and AF > 5%. These thresholds were chosen because the empirical  
127 probability of observing a CAP for neutral alleles,  $P_{neu}$ , falls below 0.05 for 1000 Genomes  
128 Project data (**Fig. 1c**), which represents a significant departure from selective neutrality  
129 and forms the basis of EPA. EPA is analogous to empirical outlier approaches frequently  
130 utilized in population genomics, including those that identify candidate adaptive  
131 polymorphisms with metrics such as  $F_{ST}$  or Tajima's  $D$  (Lewontin and Krakauer 1973;  
132 Tajima 1989). A critical difference is that we use information from both phylogenomics  
133 (EP) and population genetics (AF) to identify CAPs, which makes EPA a two-dimensional  
134 approach and complementary to available methods.

135

## 136 **Results and Discussion**

137 We applied EPA to 515,700 polymorphic missense alleles (1000 Genomes Project  
138 Consortium 2015) reported in human proteins. We retrieved EPs for each allele from  
139 <http://www.mypeg.info> (Kumar et al. 2012; Liu and Kumar 2013). The EPs were calculated  
140 by Liu et al. (2016) using a 46 species alignment of orthologous amino acid sequences  
141 (Kent et al. 2002; Liu et al. 2016). The timetree (Hedges et al. 2006) of these species covers  
142 a very large evolutionary timespan (~5.8 billion years(Hedges et al. 2015); **Fig. 1a**), such  
143 that each amino acid position has had ample time to experience mutation and purifying  
144 selection.

145 EPA revealed 18,724 candidate adaptive polymorphisms (EP < 0.05) whose allele  
146 frequencies showed significant departure from neutrality ( $P_{neu} < 0.05$ ). These CAPs were  
147 found in 7,815 proteins (see [www.mypeg.info/caps](http://www.mypeg.info/caps) for a list of residues) distributed across  
148 all autosomal chromosomes (**Fig. 2a**). Many proteins harbor multiple CAPs (**Fig. 3a**), e.g.,  
149 more than 20 CAPs were found in HLA (**Fig. 2b**) and MUC genes. Both of these gene

150 families play a role in immune response (Parham 2005; Pelaseyed et al. 2014) and are  
151 implicated in human adaptation (Andres et al. 2009; Vahdati and Wagner 2016). Several  
152 biological processes are significantly enriched for CAP-containing proteins (Mi et al. 2016),  
153 including sensory perception, immunity, and metabolism (**Fig. 3b; Supplementary Table**  
154 **1**).

155 Furthermore, a vast majority (> 70%) of known adaptive amino acid polymorphisms  
156 were found to be CAPs (**Table 1; Supplementary Table 2**), which is a significant  
157 enrichment (permutation  $P < 10^{-7}$ ). EPA also discovers a majority of the protein  
158 polymorphisms predicted to be adaptive in previous population genomic analyses  
159 (**Supplementary Table 3**), which suggested that the CAP catalog contains many truly  
160 adaptive alleles. Still, the size of the CAP catalog is over 200 times larger than the number  
161 of previously identified adaptive polymorphisms (**Table 1, Supplementary Tables 2 and**  
162 **3**).

163 Previous work would lead us to believe that the majority of common missense  
164 mutations are either selectively neutral, in which case allele frequencies are primarily  
165 driven by genetic drift, or are mildly deleterious (Kryukov et al. 2007; Zhu et al. 2011), in  
166 which case allele frequencies could reflect some combination of drift, compensatory  
167 variation, or epistasis. In addition, several non-adaptive phenomena could artificially  
168 inflate neutral or deleterious missense allele frequencies. We, therefore, examined the  
169 extent to which genomic features and demographic processes could have given rise to  
170 CAPs.

#### 171 *Mutation rate differences and biased gene conversion*

172 Given that mutation rates are known to affect allele frequencies (Harpak et al. 2016), we  
173 investigated the potential for mutation rate variation to result in false positive CAPs. We  
174 first examined if mutation rates were elevated in codons containing CAPs by comparing  
175 the rate of occurrence of synonymous variants in codons that contained CAPs with codons  
176 that did not contain CAPs. These two rates were very similar, as 5.7% of the CAP-  
177 containing codons also harbored a synonymous polymorphism and 5.4% of non-CAP  
178 codons harbored a synonymous polymorphism. This result suggests that mutation rate  
179 differences do not explain the observed distribution of CAP allele frequencies.

180 In addition, the hypermutability of CpG sites did not explain the persistence of low EP

181 alleles at high frequency due to recurrent mutations. We found a smaller proportion of CpG  
182 overlapping CAPs relative to non-CAPs (26% and 33%, respectively). Furthermore, we  
183 considered whether biased gene conversion could result in false positive CAPs  
184 (Ratnakumar et al. 2010). However, fewer than 1% of CAPs were within regions of known  
185 biased gene conversion (Capra et al. 2013; Rosenbloom et al. 2015), and the frequencies  
186 of weak to strong (W→S) and strong to weak (S→W) changes (Lachance and Tishkoff  
187 2014) for non-CAP alleles (with EP < 0.05 and AF < 5%) were not significantly different  
188 than CAP alleles ( $P = 0.90$ ).

### 189 *Relaxation of purifying selection*

190 We also examined the possibility that CAP-containing human proteins have experienced  
191 relaxation of function in the human lineage. While we think this is unlikely, because it  
192 would require a vast fraction of human proteins (> 7,000 out of 22,000) to be under reduced  
193 selection, we investigated missense mutations that cause Mendelian diseases and compared  
194 the frequency of these mutations in CAP-containing proteins and non-CAP proteins (see  
195 **Methods**). We did not find a significant difference in the preponderance of disease  
196 mutations in CAP and non-CAP proteins. Therefore, it is unlikely that CAP-containing  
197 proteins have become less functionally important relative to other human proteins.

### 198 *Adaptive hitchhiking*

199 Deleterious alleles located in genomic regions, which have undergone selective sweeps,  
200 can hitchhike to higher than expected frequencies merely due to proximity to and linkage  
201 disequilibrium with nearby adaptive alleles (Chun and Fay 2011). Only a small number of  
202 CAPs (6.7%) are located in selective sweep regions (Schridder and Kern 2016). This  
203 observation is supported by previous studies (Chun and Fay 2011) that investigated the  
204 impact of hitchhiking on deleterious allele frequencies and found only a few hundred  
205 deleterious hitchhiking nonsynonymous SNPs with common allele frequencies ( $\geq 5.9\%$ ) in  
206 the 1000 Genomes Project data. Therefore, hitchhiking of deleterious alleles with selective  
207 sweeps does not appear to explain an overwhelming majority of CAPs.

### 208 *Human demography*

209 Human demographic history may explain the prevalence of CAPs, because the migration  
210 of modern humans out of Africa and subsequent population expansions could have resulted

211 in higher than expected frequencies of deleterious and mildly deleterious alleles. However,  
212 it is not likely that these alleles overwhelm the set of CAPs identified, since even a purely  
213 neutral model of human evolution does not explain the fraction of alleles found at high  
214 allele frequencies: the SFS of empirical CAPs shows a dramatic skew towards high  
215 frequency alleles relative to neutral expectation (**Fig. 4a**). We then tested if the CAPs SFS  
216 can be generated by human demographic history in combination with various models of  
217 selection. We employed a model based on differential equations to approximate the  
218 evolution of allele frequencies (Jouganous et al. 2017) and simulated a wide range of  
219 negative and positive selection coefficients for a demographic model of recent human  
220 history (Gravel et al. 2011) with a range of gamma parameter values (see **Methods**). A  
221 model containing negative and positive selections provided the best fit for the CAPs SFS  
222 ( $\ln L = -3,080$ ;  $P \ll 10^{-10}$ ; **Fig. 4b**). In this model, 47% of the observed alleles were  
223 predicted to be weakly deleterious ( $s = -8 \times 10^{-4}$ ) and the remaining 53% were beneficial  
224 ( $s = +1 \times 10^{-3}$ ).

225 However, even the best-fit simulated selection model failed to explain the  
226 preponderance of polymorphisms with very high frequency (>95%). The number of  
227 empirical CAPs in this category was over three times greater than expected (**Fig. 4b**). This  
228 result led us to consider whether CAPs were common in the ancestors of modern humans  
229 and represent ancestral standing variation. We examined the proportion of CAPs that were  
230 shared with archaic hominins (Neanderthals and Denisovans) (Green et al. 2010; Meyer et  
231 al. 2012; Prüfer et al. 2014) and found that 43% of CAPs are shared with modern humans.  
232 This proportion is significantly higher than what is expected by chance (permutation  $P <$   
233  $10^{-7}$ ). While some of the shared CAPs could have resulted from archaic gene flow, the  
234 majority of these CAPs were likely present in the last common ancestor of modern humans  
235 and archaic hominids, because most (93.6%) shared CAPs occur at very high frequencies  
236 ( $AF > 95\%$ ) in modern humans. One such possibility is a CAP (rs4987682) in *TRPV6*,  
237 which is present in the Altai Neanderthal genome (Prüfer et al. 2014). *TRPV6* is involved  
238 in calcium absorption (Hughes et al. 2008) and located in a region of the genome that has  
239 been identified in several previous genome-wide scans for selection (Akey et al. 2006;  
240 Hughes et al. 2008). This region is hypothesized to have been subjected to multiple  
241 selective events (Hughes et al. 2008).



## 242 *Validating CAPs*

243 Generally, traditional functional evaluation of CAPs that arose in the human lineage is  
244 challenging, because *in vitro* and *in vivo* approaches are low-throughput, require *a priori*  
245 functional information for experimental design, and do not provide the impact of individual  
246 alleles on higher-level human phenotypes. Furthermore, it is not possible to test human  
247 fitness in a controlled/laboratory setting, and it is often not relevant to test the functional  
248 impact of CAPs in non-human model systems. It is, however, possible to take an  
249 organismal approach to investigate allelic impact on natural, population-level human  
250 variation using phenotype-association studies. For example, many well-known adaptive  
251 missense variants (**Table 1**) are also significantly associated with phenotypes in genome-  
252 wide studies: rs334 with malaria and severe malaria (Band et al. 2013; Timmann et al.  
253 2012), rs4987667 with intermediate gene expression phenotypes involving HLA  
254 (Fehrmann et al. 2011), and rs1426654 with skin pigmentation (Stokowski et al. 2007).

255 Therefore, we searched the Human Gene Mutation Database (HGMD) (Stenson et al.  
256 2009) for high EP alleles associated with reduced fitness, i.e., the low EP CAP alleles  
257 associated with fitness benefits. That is, the evolutionarily preferred allele prior to the  
258 divergence of humans and chimpanzees (high EP,  $EP > 0.5$ ) has experienced a reversal of  
259 fortune and become detrimental. We found 253 high EP alleles to be associated with disease  
260 phenotypes in contemporary humans, where the low EP CAP allele occurs with  $AF > 5\%$ .

261 We also scanned the NHGRI-EBI catalog (MacArthur et al. 2017) of curated GWAS  
262 studies to identify additional CAP and found 158 CAPs. Of these, 101 showed odds ratio  
263 (OR) less than one for at least one discrete trait related to reduction in the incidence of the  
264 associated abnormal phenotype. That is, 60% of the CAPs are protective against the  
265 increased disease risk (**Supplementary Table 4**). One such example is a CAP found in the  
266 LOXL1 protein that confers a 20-fold decrease in risk for developing exfoliation glaucoma,  
267 a leading cause of irreversible blindness (Thorleifsson et al. 2007). Another is *APOE*,  
268 which decreases risk five-fold for significant cerebral amyloid deposition (Li et al. 2015).  
269 These findings not only suggest functional implications of CAPs, but also that many CAPs  
270 are associated with health benefits.

271 Beyond the limited number of variants in the NHGRI-EBI GWAS catalog, we  
272 investigated phenotypic associations in GWAS database that contains a large catalog of

273 genotype-phenotype association studies. We mined data available from GRASP2 (Leslie  
274 et al. 2014) to determine whether CAPs have had significant impact on human phenotypes  
275 more broadly. We found that 11% of CAPs were significantly associated with tested  
276 phenotypes (2,073 alleles at a significance threshold of  $P < 10^{-8}$ ), which we refer to as  
277 pheno-CAPs. This prevalence of pheno-CAPs is significantly higher than what is expected  
278 by chance (permutation  $P < 10^{-7}$ ). Moreover, less than 1% of frequency matched non-CAP  
279 alleles are significantly phenotype-associated in GRASP2 ( $P < 10^{-8}$ ). We tested the  
280 possibility that low-EP deleterious recessive alleles have persisted at significant population  
281 frequencies. If this had been the case, we would expect an excess of heterozygote CAPs  
282 relative to neutral expectations. However, very few CAPs (2.5%) displayed a significant  
283 excess of heterozygosity ( $\chi^2$   $P$ -value  $< 0.05$ ). Moreover, after excluding pheno-CAPs that  
284 are not shared across all 1000 Genomes continental samples (1000 Genomes Project  
285 Consortium 2015), that are located in previously identified selective sweeps (Schridder and  
286 Kern 2016), and that are located in previously identified regions containing CpG sites and  
287 biased gene conversion regions (Rosenbloom et al. 2015), over 1000 proteins contain one  
288 or more pheno-CAPs.

289 We expect pheno-CAPs to be enriched for causal alleles. There are many reasons for  
290 this expectation. First, amino acid polymorphisms alter the sequence of functional genome  
291 entities (proteins). Second, if pheno-CAPs are causal alleles then we would expect them to  
292 show the strongest association  $P$ -values among all tested missense variants. This is indeed  
293 the case for 92% of CAP proteins, where a pheno-CAP has the strongest association of all  
294 missense variants in that protein for a given phenotype in the GRASP2 database (Leslie et  
295 al. 2014). Third, a vast majority of putative adaptive variants in humans are CAPs (**Table**  
296 **1**) and are derived variants in modern-humans; they are not shared with archaic hominins.

297 In conclusion, we have found over 18,000 missense human polymorphisms that are  
298 candidates of beneficial selection. This new adaptive allele catalog is made possible by the  
299 EP approach, which is sensitive to a timeframe that predates the out of Africa migration of  
300 modern humans, but is not limited to fixed differences between species (Anisimova and  
301 Yang 2007; Goldman and Yang 1994; Holt et al. 2008; Hurst 2002; Lindblad-Toh et al.  
302 2011; Muse and Gaut 1994; Nielsen et al. 2005; Peter et al. 2012; Pollard et al. 2006;  
303 Shapiro and Alm 2008; Yang and Bielawski 2000). The former timeframe has been

304 addressed by methods that are sensitive to recent classic sweeps and regionally restricted  
305 adaptation, which have been the focus of the majority of human adaptation studies to date  
306 (Akey 2009; Akey et al. 2002; Grossman et al. 2013; Li and Stephan 2006; Moon and Akey  
307 2016; Sabeti et al. 2007; Teshima et al. 2006; Voight et al. 2006). These studies have yielded  
308 only a few adaptive coding variants, leading some to argue that regulatory variation is the  
309 predominant raw material for adaptive change (Akey 2009; Fraser 2013; Grossman et al.  
310 2013). Our results suggest that the temporal sensitivity of the EP approach is able to  
311 generate a catalog of candidate adaptive polymorphisms that is enriched in functional as  
312 well as beneficial variation. We expect many CAPs to be involved in compensatory  
313 evolution and synergistic epistasis to counter genetic load exerted by deleterious variants  
314 that have risen to high frequencies due to human demography and genetic drift. Therefore,  
315 CAPs provide ready hypotheses to test in future computational and experimental  
316 investigations.  
317

## 318 **Materials and Methods**

### 319 *1000 Genomes Allele Frequencies*

320 Global allele frequencies (AFs) for all missense single nucleotide polymorphisms (SNPs)  
321 ( $n = 515,700$ ) in the 1000 Genomes Project phase 3 data (1000 Genomes Project  
322 Consortium 2015) were calculated for all unrelated individuals ( $n = 2,405$ ). More  
323 specifically, one of each related pair of individuals identified in the Phase 3 release  
324 ([ftp://ftp.1000genomes.ebi.ac.uk/vol1/ftp/release/20130502/20140625\\_related\\_individual](ftp://ftp.1000genomes.ebi.ac.uk/vol1/ftp/release/20130502/20140625_related_individual_s.txt)  
325 [s.txt](ftp://ftp.1000genomes.ebi.ac.uk/vol1/ftp/release/20130502/20140625_related_individual_s.txt)) was removed before calculating global allele frequencies. For each polymorphic  
326 nucleotide position, EP estimates for the codons corresponding to the reference (hg19) and  
327 non-reference nucleotides were used. For each allele, we tested for an overrepresentation  
328 of potentially deleterious recessive CAP heterozygotes and evaluated the proportion of  
329 CAPs that were in Hardy-Weinberg (HW) disequilibrium (HW  $\chi^2$   $P$ -value  $< 0.05$ ).

### 330 *Evolutionary Probabilities*

331 Evolutionary probabilities (EPs) were calculated for each amino acid residue using the  
332 method of Liu et al. (Liu et al. 2016) and a 46 species alignment of orthologous amino acid  
333 sequences (Kent et al. 2002; Liu et al. 2016) (they are available from  
334 <http://www.mypeg.info> (Kumar et al. 2012; Liu and Kumar 2013)). The timetree (Hedges  
335 et al. 2006) of these species covers a very large evolutionary timespan (~5.8 billion years  
336 (Hedges et al. 2015); **Fig. 1a**), such that each amino acid position has had ample time to  
337 experience mutation and purifying selection. We designed a simulation to verify that the  
338 EP was over 0.05 for neutral alleles, by using the 46 species time tree in **Fig. 1a** and branch  
339 lengths from UCSC (Kent et al. 2002; Liu et al. 2016; Murphy et al. 2001; Siepel and  
340 Haussler 2005). Using pyvolve v0.8.7 (Spielman and Wilke 2015), we generated 1000  
341 replicate datasets of proteins with 500 amino acid positions and calculated EP for alleles at  
342 each site.

### 343 *Evolutionary Probability Approach Framework*

344 We began with the premise that for a given amino acid position, the probability the position  
345 has been neutral (EP) over long-term evolutionary history (inferred from inter-species  
346 comparisons as described in (Liu et al. 2016)) combined with the orthogonal shorter-term  
347 intra-specific purifying and directional selective pressures (captured by population allele  
348 frequency, AF) produces a categorical framework for genome-wide variation. This

349 framework distinguishes neutral, potentially deleterious, and potentially adaptive variation.  
350 The sum of all allelic EPs is 1 for each amino acid position, and residues with low EP (<  
351 0.05) are unexpected under neutral theory (Liu et al. 2016). We developed an empirical  
352 framework to identify candidate adaptive polymorphisms (CAPs): Prob(AF | EP < 0.05),  
353 and for each allele, calculated a one-sided cumulative empirical *P*-value using a cumulative  
354 distribution function (CDF) implemented with a custom R script (R Core Team 2014).

### 355 *Misinferece of ancestral state*

356 In genomic scans for selection, misidentification of ancestral states may cause false  
357 signatures of selection (Baudry and Depaulis 2003). EPA fortunately does not suffer from  
358 this problem, because it requires EP < 0.05. An allele with such a low EP will likely arise  
359 in the human lineage after their divergence from chimpanzees. Additionally, EP calculation  
360 utilizes a probabilistic model that integrates over all the outgroup species in an alignment,  
361 which makes it better than methods that utilize one or a few outgroups to properly identify  
362 the derived allele (Hernandez et al. 2007; Keightley et al. 2016). Consistent with this  
363 property, we did not find any CAP alleles in all three of the Great Ape species (chimpanzee,  
364 gorilla, and orangutan) in our multispecies protein alignments. A comparison with  
365 chimpanzee proteins revealed 3.5% CAP allele sharing, and gorilla and orangutan showed  
366 0.7% and 1.1% CAP allele sharing, respectively, with humans. We excluded all of these  
367 alleles from all the population genetic analyses, because these CAP residues may have  
368 arisen prior to the origin of human lineage.

### 369 *Identifying allele sharing with archaic genomes*

370 To determine allele sharing among modern humans and archaic hominins, we collected  
371 genome sequencing data for five archaic hominins (four Neanderthal individuals, and one  
372 Denisovan individual). One Neanderthal sequence and one Denisovan sequence were  
373 acquired from the Max Planck Institute for Evolutionary Anthropology site  
374 (<http://cdna.eva.mpg.de/neandertal/altai/Denisovan>). The three remaining Neanderthal  
375 alignments were retrieved from the UCSC Neanderthal Sequence Track  
376 (<https://genome.ucsc.edu/cgi-bin/hgTrackUi?db=hg19&g=ntSeqReads>). We only used  
377 sequences that provided > 45% genomic coverage. We defined an allele as shared if it was  
378 present in any of these five archaic individuals. A shared allele can be polymorphic or fixed  
379 in this aggregated archaic sample.

### 380 *Scanning Genotype-Phenotype Association Catalogs*

381 We scanned 75,810 phenotype associated missense mutations in the Human Gene Mutation  
382 Database (HGMD) (Stenson et al. 2009) for those that occur at CAP sites. We found 973  
383 such mutations, which we checked for high EP risk-alleles (causing the abnormal  
384 phenotype). A high EP risk allele at a CAP site was considered a “reversal”, since this  
385 previously favored allele (based on EP) leads to an unfavorable phenotype. We also  
386 scanned the NHGRI-EBI GWAS catalog (MacArthur et al. 2017) (January 16, 2018 update)  
387 for similar reversals. Filtering the SNPs, we find 158 missense mutations at CAP sites. The  
388 NHGRI-EBI GWAS Catalog always reports the risk-allele (the allele that increases  
389 phenotypic measurement, e.g., increases disease risk). In order to determine the odds ratio  
390 (OR) for the CAP allele, which is often not the reported risk allele, we calculated the  
391 inverse ( $1 / \text{reported OR}$ ) when the risk allele was in fact the reversal (high EP allele). An  
392  $\text{OR} < 1$  indicates that the allele confers a decrease in abnormal phenotype risk, while an  
393  $\text{OR} > 1$  indicates that the allele increases risk for the associated abnormal or case phenotype.  
394 Multiple associations were occasionally found for CAPs in the GWAS catalog. We simply  
395 reported the study that had the lowest risk-factor (OR) for abnormal phenotypes per CAP  
396 allele found.

### 397 *Gene Ontology Enrichment*

398 We used the Panther Classification System (Mi et al. 2016) to test for enrichment of Gene  
399 Ontology (GO slim) biological processes. As input, we used the list of protein IDs that  
400 contain one or more CAPs. We excluded terms with less than two proteins, and we adjusted  
401 enrichment  $P$  values to account for multiple testing with a Bonferroni correction.

### 402 *Demographic Simulations*

403 We performed 10,000 forward simulations of human history for 58,000 generations before  
404 current time; the simulation scheme includes the out-of-Africa migration of humans (OoA),  
405 as well as a subsequent split between simulated European and East Asian populations. The  
406 population model includes three representative continental groups (African, European,  
407 East Asian). SLiM2 (Haller and Messer 2017) was used for the simulations, with  
408 parameters obtained by Gravel et. Al (Gravel et al. 2011). Using a modified SLiM2 script  
409 to output MS (Hudson) format chromosomes, we sampled individual sequences (50,000  
410 base pairs in length) from the simulated populations at each of the following time points:

411 (a) the generation immediately before the OoA split (ancestral population), (b) the  
412 generation immediately before the European and East Asian split, (c) the contemporary  
413 African population, (d) the contemporary European population, and (e) the contemporary  
414 East Asian population. Using allele frequencies (AF) from these samples, we followed  
415 variants at different AF (0.1%, 1%, and 10%) in the ancestral population and traced their  
416 trajectories into the modern day human populations (contemporary populations). For each  
417 of these variants, we determined the fraction that achieved > 5% AF (required for CAP  
418 status), and were shared among one, two, and three of the contemporary population  
419 samples.

#### 420 *Simulating selection and fitting distributions of fitness effects*

421 We simulated site frequency spectra (SFS) using Moments (Jouganous et al. 2017) to infer  
422 distributions of fitness effects (DFE) that explain CAPs for which the human alleles were  
423 not shared with any of the three great ape species (chimpanzee, gorilla, and orangutan).  
424 Using *dadi* (Gutenkunst et al. 2009), we calculated multinomial log-likelihoods (*lnLs*) of  
425 the observed data (CAPs) for simulated deleterious, neutral, and beneficial selection  
426 models (as above). We also calculated *lnL* of DFE fit for all possible combinations:  
427 deleterious and neutral; neutral and positive; deleterious and beneficial; and, deleterious  
428 and, neutral, and beneficial. In this case, we used a single point mass fixed for each type of  
429 selection and explored various  $2N_e s$  values. The model with the highest *lnL* provides the  
430 best fit for the observed data. We excluded all CAPs shared with great apes in these  
431 analyses. The best fit model and *lnL* values for all the CAPs are shown in **Fig. 4b**. We used  
432 likelihood fits and Akaike information criterion (AIC) to select the best model.

#### 433 *Examination of the Relaxation of purifying selection*

434 We examined the possibility that CAP-containing human proteins have experienced  
435 relaxation of function in the human lineage. We investigated missense mutations that cause  
436 Mendelian diseases and compared the frequency of these mutations in CAP-containing  
437 proteins and non-CAP proteins. This analysis used the HumVar (Adzhubei et al. 2010)  
438 dataset and obtained the number of disease mutations normalized by the total sequence  
439 length and evolutionary rate of CAP and non-CAP proteins. This normalization is required  
440 because longer proteins are known to contain more disease mutations as do slower evolving  
441 proteins (Miller and Kumar 2001). The ratio of two normalized counts was 0.98, which is

442 close to the expected value of 1.0 corresponding to no difference in the preponderance of  
443 disease mutations in CAP and non-CAP proteins.

#### 444 *Permutation Testing*

445 In order to determine whether the observed proportion of CAPs that have been previously  
446 identified as adaptive in humans is higher than would be expected by chance, we randomly  
447 sampled 18,724 variants from the set of all human missense variants (regardless of EP),  
448 and calculated  $N_{\text{sim}}$ , which captures how often the simulated proportion of phenotype-  
449 associated variants was as high or higher than the empirical result. In total, we ran  $10^6$   
450 permutations, and calculated a permutation  $P$ -value with the following equation:  $(N_{\text{sim}} +$   
451  $1)/1000001$ .

452 Similarly, we tested whether the observed proportion of CAPs that are shared with archaic  
453 genomes is higher than would be expected by chance. We randomly sampled 18,724  
454 variants from the set of all human missense variants, and calculated  $N_{\text{sim}}$ , which captures  
455 how often the simulated proportion of archaic-shared variants was as high or higher than  
456 the empirical result (6,916 for  $P < 0.05$  and 2,075 for  $P < 10^{-8}$ ). In total, we ran  $10^6$   
457 permutations, and calculated a permutation  $P$ -value with the following equation:  $(N_{\text{sim}} +$   
458  $1)/1000001$ .

459 In order to determine whether the observed proportion of CAPs that are also associated  
460 with phenotypes in the GRASP2 database (Leslie et al. 2014) is higher than would be  
461 expected by chance, we randomly sampled 18,724 variants from the set of all human  
462 missense variants with an AF  $> 1\%$  (regardless of EP), and calculated  $N_{\text{sim}}$ , which captures  
463 how often the simulated proportion of phenotype-associated variants was as high or higher  
464 than the empirical result (6,916 for  $P < 0.05$  and 2075 for  $P < 10^{-8}$ ). In total, we ran  $10^6$   
465 permutations, and calculated a permutation  $P$ -value with the following equation:  $(N_{\text{sim}} +$   
466  $1)/1000001$ .



## References

- 467  
468  
469 1000 Genomes Project Consortium. 2015. A global reference for human genetic variation.  
470 Nature 526(7571):68-74.
- 471 Adzhubei IA, Schmidt S, Peshkin L, Ramensky VE, Gerasimova A, Bork P, Kondrashov  
472 AS, Sunyaev SR. 2010. A method and server for predicting damaging missense  
473 mutations. Nat Methods 7(4):248-9.
- 474 Akey JM. 2009. Constructing genomic maps of positive selection in humans: where do we  
475 go from here? Genome Res 19(5):711-22.
- 476 Akey JM, Swanson WJ, Madeoy J, Eberle M, Shriver MD. 2006. TRPV6 exhibits unusual  
477 patterns of polymorphism and divergence in worldwide populations. Hum Mol  
478 Genet 15(13):2106-13.
- 479 Akey JM, Zhang G, Zhang K, Jin L, Shriver MD. 2002. Interrogating a high-density SNP  
480 map for signatures of natural selection. Genome Research 12(12):1805-1814.
- 481 Andres AM, Hubisz MJ, Indap A, Torgerson DG, Degenhardt JD, Boyko AR, Gutenkunst  
482 RN, White TJ, Green ED, Bustamante CD et al. 2009. Targets of balancing  
483 selection in the human genome. Mol Biol Evol 26(12):2755-64.
- 484 Anisimova M, Yang ZH. 2007. Multiple hypothesis testing to detect lineages under positive  
485 selection that affects only a few sites. Molecular Biology and Evolution  
486 24(5):1219-1228.
- 487 Band G, Le QS, Jostins L, Pirinen M, Kivinen K, Jallow M, Sisay-Joof F, Bojang K, Pinder  
488 M, Sirugo G et al. 2013. Imputation-based meta-analysis of severe malaria in three  
489 African populations. PLoS Genet 9(5):e1003509.
- 490 Baudry E, Depaulis F. 2003. Effect of misoriented sites on neutrality tests with outgroup.  
491 Genetics 165(3):1619-1622.
- 492 Boyko AR, Williamson SH, Indap AR, Degenhardt JD, Hernandez RD, Lohmueller KE,  
493 Adams MD, Schmidt S, Sninsky JJ, Sunyaev SR et al. 2008. Assessing the  
494 evolutionary impact of amino acid mutations in the human genome. PLoS Genet  
495 4(5):e1000083.
- 496 Capra JA, Hubisz MJ, Kostka D, Pollard KS, Siepel A. 2013. A model-based analysis of  
497 GC-biased gene conversion in the human and chimpanzee genomes. PLoS Genet

- 498 9(8):e1003684.
- 499 Chun S, Fay JC. 2011. Evidence for Hitchhiking of Deleterious Mutations within the  
500 Human Genome. *Plos Genetics* 7(8).
- 501 Enard D, Messer PW, Petrov DA. 2014. Genome-wide signals of positive selection in  
502 human evolution. *Genome Res* 24(6):885-95.
- 503 Fehrmann RS, Jansen RC, Veldink JH, Westra HJ, Arends D, Bonder MJ, Fu J, Deelen P,  
504 Groen HJ, Smolonska A et al. 2011. Trans-eQTLs reveal that independent genetic  
505 variants associated with a complex phenotype converge on intermediate genes, with  
506 a major role for the HLA. *PLoS Genet* 7(8):e1002197.
- 507 Fraser HB. 2013. Gene expression drives local adaptation in humans. *Genome Res*  
508 23(7):1089-96.
- 509 Goldman N, Yang Z. 1994. A codon-based model of nucleotide substitution for protein-  
510 coding DNA sequences. *Mol Biol Evol* 11(5):725-36.
- 511 Gravel S, Henn BM, Gutenkunst RN, Indap AR, Marth GT, Clark AG, Yu F, Gibbs RA,  
512 Genomes P, Bustamante CD. 2011. Demographic history and rare allele sharing  
513 among human populations. *Proc Natl Acad Sci U S A* 108(29):11983-8.
- 514 Green RE, Krause J, Briggs AW, Maricic T, Stenzel U, Kircher M, Patterson N, Li H, Zhai  
515 W, Fritz MH et al. 2010. A draft sequence of the Neandertal genome. *Science*  
516 328(5979):710-22.
- 517 Grossman SR, Andersen KG, Shlyakhter I, Tabrizi S, Winnicki S, Yen A, Park DJ,  
518 Griesemer D, Karlsson EK, Wong SH et al. 2013. Identifying recent adaptations in  
519 large-scale genomic data. *Cell* 152(4):703-13.
- 520 Gutenkunst RN, Hernandez RD, Williamson SH, Bustamante CD. 2009. Inferring the joint  
521 demographic history of multiple populations from multidimensional SNP  
522 frequency data. *PLoS Genet* 5(10):e1000695.
- 523 Haller BC, Messer PW. 2017. SLiM 2: Flexible, Interactive Forward Genetic Simulations.  
524 *Mol Biol Evol* 34(1):230-240.
- 525 Harpak A, Bhaskar A, Pritchard JK. 2016. Mutation Rate Variation is a Primary  
526 Determinant of the Distribution of Allele Frequencies in Humans. *PLoS Genet*  
527 12(12):e1006489.
- 528 Hedges SB, Dudley J, Kumar S. 2006. TimeTree: a public knowledge-base of divergence

- 529 times among organisms. *Bioinformatics* 22(23):2971-2.
- 530 Hedges SB, Marin J, Suleski M, Paymer M, Kumar S. 2015. Tree of life reveals clock-like  
531 speciation and diversification. *Mol Biol Evol* 32(4):835-45.
- 532 Hernandez RD, Kelley JL, Elyashiv E, Melton SC, Auton A, McVean G, Genomes P, Sella  
533 G, Przeworski M. 2011. Classic selective sweeps were rare in recent human  
534 evolution. *Science* 331(6019):920-4.
- 535 Hernandez RD, Williamson SH, Bustamante CD. 2007. Context dependence, ancestral  
536 misidentification, and spurious signatures of natural selection. *Molecular Biology  
537 and Evolution* 24(8):1792-1800.
- 538 Holt KE, Parkhill J, Mazzoni CJ, Roumagnac P, Weill FX, Goodhead I, Rance R, Baker S,  
539 Maskell DJ, Wain J et al. 2008. High-throughput sequencing provides insights into  
540 genome variation and evolution in *Salmonella Typhi*. *Nature Genetics* 40(8):987-  
541 993.
- 542 Hudson RR, Kreitman M, Aguade M. 1987. A test of neutral molecular evolution based on  
543 nucleotide data. *Genetics* 116(1):153-9.
- 544 Hughes DA, Tang K, Strotmann R, Schoneberg T, Prenen J, Nilius B, Stoneking M. 2008.  
545 Parallel selection on TRPV6 in human populations. *PLoS One* 3(2):e1686.
- 546 Hurst LD. 2002. The Ka/Ks ratio: diagnosing the form of sequence evolution. *Trends in  
547 Genetics* 18(9):486-487.
- 548 Jouganous J, Long W, Ragsdale AP, Gravel S. 2017. Inferring the Joint Demographic  
549 History of Multiple Populations: Beyond the Diffusion Approximation. *Genetics*  
550 206(3):1549-1567.
- 551 Keightley PD, Campos JL, Booker TR, Charlesworth B. 2016. Inferring the Frequency  
552 Spectrum of Derived Variants to Quantify Adaptive Molecular Evolution in  
553 Protein-Coding Genes of *Drosophila melanogaster*. *Genetics* 203(2):975-+.
- 554 Kent WJ, Sugnet CW, Furey TS, Roskin KM, Pringle TH, Zahler AM, Haussler D. 2002.  
555 The human genome browser at UCSC. *Genome Res* 12(6):996-1006.
- 556 Kimura M. 1983. *The neutral theory of molecular evolution*. Cambridge: Cambridge  
557 University Press.
- 558 Kryukov GV, Pennacchio LA, Sunyaev SR. 2007. Most rare missense alleles are  
559 deleterious in humans: implications for complex disease and association studies.

- 560 Am J Hum Genet 80(4):727-39.
- 561 Kumar S, Sanderford M, Gray VE, Ye J, Liu L. 2012. Evolutionary diagnosis method for  
562 variants in personal exomes. Nat Methods 9(9):855-6.
- 563 Lachance J, Tishkoff SA. 2014. Biased gene conversion skews allele frequencies in human  
564 populations, increasing the disease burden of recessive alleles. Am J Hum Genet  
565 95(4):408-20.
- 566 Leslie R, O'Donnell CJ, Johnson AD. 2014. GRASP: analysis of genotype-phenotype  
567 results from 1390 genome-wide association studies and corresponding open access  
568 database. Bioinformatics 30(12):i185-94.
- 569 Lewontin RC, Krakauer J. 1973. Distribution of Gene Frequency as a Test of Theory of  
570 Selective Neutrality of Polymorphisms. Genetics 74(1):175-195.
- 571 Li HP, Stephan W. 2006. Inferring the demographic history and rate of adaptive substitution  
572 in *Drosophila*. Plos Genetics 2(10):1580-1589.
- 573 Li QS, Parrado AR, Samtani MN, Narayan VA, Alzheimer's Disease Neuroimaging I. 2015.  
574 Variations in the FRA10AC1 Fragile Site and 15q21 Are Associated with  
575 Cerebrospinal Fluid Abeta1-42 Level. PLoS One 10(8):e0134000.
- 576 Lindblad-Toh K, Garber M, Zuk O, Lin MF, Parker BJ, Washietl S, Kheradpour P, Ernst J,  
577 Jordan G, Mauceli E et al. 2011. A high-resolution map of human evolutionary  
578 constraint using 29 mammals. Nature 478(7370):476-482.
- 579 Liu L, Kumar S. 2013. Evolutionary balancing is critical for correctly forecasting disease-  
580 associated amino acid variants. Mol Biol Evol 30(6):1252-7.
- 581 Liu L, Tamura K, Sanderford M, Gray VE, Kumar S. 2016. A Molecular Evolutionary  
582 Reference for the Human Variome. Mol Biol Evol 33(1):245-54.
- 583 MacArthur J, Bowler E, Cerezo M, Gil L, Hall P, Hastings E, Junkins H, McMahon A,  
584 Milano A, Morales J et al. 2017. The new NHGRI-EBI Catalog of published  
585 genome-wide association studies (GWAS Catalog). Nucleic Acids Research  
586 45(D1):D896-D901.
- 587 McDonald JH, Kreitman M. 1991. Adaptive protein evolution at the *Adh* locus in  
588 *Drosophila*. Nature 351(6328):652-4.
- 589 Meyer M, Kircher M, Gansauge MT, Li H, Racimo F, Mallick S, Schraiber JG, Jay F, Prufer  
590 K, de Filippo C et al. 2012. A high-coverage genome sequence from an archaic

- 591 Denisovan individual. *Science* 338(6104):222-6.
- 592 Mi H, Poudel S, Muruganujan A, Casagrande JT, Thomas PD. 2016. PANTHER version  
593 10: expanded protein families and functions, and analysis tools. *Nucleic Acids Res*  
594 44(D1):D336-42.
- 595 Miller MP, Kumar S. 2001. Understanding human disease mutations through the use of  
596 interspecific genetic variation. *Hum Mol Genet* 10(21):2319-28.
- 597 Moon S, Akey JM. 2016. A flexible method for estimating the fraction of fitness  
598 influencing mutations from large sequencing data sets. *Genome Res* 26(6):834-43.
- 599 Murphy WJ, Eizirik E, O'Brien SJ, Madsen O, Scally M, Douady CJ, Teeling E, Ryder OA,  
600 Stanhope MJ, de Jong WW et al. 2001. Resolution of the early placental mammal  
601 radiation using Bayesian phylogenetics. *Science* 294(5550):2348-51.
- 602 Muse SV, Gaut BS. 1994. A likelihood approach for comparing synonymous and  
603 nonsynonymous nucleotide substitution rates, with application to the chloroplast  
604 genome. *Mol Biol Evol* 11(5):715-24.
- 605 Nielsen R, Bustamante C, Clark AG, Glanowski S, Sackton TB, Hubisz MJ, Fledel-Alon  
606 A, Tanenbaum DM, Civello D, White TJ et al. 2005. A scan for positively selected  
607 genes in the genomes of humans and chimpanzees. *Plos Biology* 3(6):976-985.
- 608 Parham P. 2005. MHC class I molecules and KIRs in human history, health and survival.  
609 *Nat Rev Immunol* 5(3):201-14.
- 610 Pelaseyed T, Bergstrom JH, Gustafsson JK, Ermund A, Birchenough GM, Schutte A, van  
611 der Post S, Svensson F, Rodriguez-Pineiro AM, Nystrom EE et al. 2014. The mucus  
612 and mucins of the goblet cells and enterocytes provide the first defense line of the  
613 gastrointestinal tract and interact with the immune system. *Immunol Rev* 260(1):8-  
614 20.
- 615 Peter BM, Huerta-Sanchez E, Nielsen R. 2012. Distinguishing between Selective Sweeps  
616 from Standing Variation and from a De Novo Mutation. *Plos Genetics* 8(10).
- 617 Pollard KS, Salama SR, Lambert N, Lambot MA, Coppens S, Pedersen JS, Katzman S,  
618 King B, Onodera C, Siepel A et al. 2006. An RNA gene expressed during cortical  
619 development evolved rapidly in humans. *Nature* 443(7108):167-172.
- 620 Prufer K, Racimo F, Patterson N, Jay F, Sankararaman S, Sawyer S, Heinze A, Renaud G,  
621 Sudmant PH, de Filippo C et al. 2014. The complete genome sequence of a

- 622 Neanderthal from the Altai Mountains. *Nature* 505(7481):43-9.
- 623 R Core Team. 2014. R: A language and environment for statistical computing. Vienna,  
624 Austria: R Foundation for Statistical Computing.
- 625 Ratnakumar A, Mousset S, Glemin S, Berglund J, Galtier N, Duret L, Webster MT. 2010.  
626 Detecting positive selection within genomes: the problem of biased gene  
627 conversion. *Philosophical Transactions of the Royal Society B-Biological Sciences*  
628 365(1552):2571-2580.
- 629 Rosenbloom KR, Armstrong J, Barber GP, Casper J, Clawson H, Diekhans M, Dreszer TR,  
630 Fujita PA, Guruvadoo L, Haeussler M et al. 2015. The UCSC Genome Browser  
631 database: 2015 update. *Nucleic Acids Res* 43(Database issue):D670-81.
- 632 Sabeti PC, Varilly P, Fry B, Lohmueller J, Hostetter E, Cotsapas C, Xie XH, Byrne EH,  
633 McCarroll SA, Gaudet R et al. 2007. Genome-wide detection and characterization  
634 of positive selection in human populations. *Nature* 449(7164):913-U12.
- 635 Schrider DR, Kern AD. 2016. Soft sweeps are the dominant mode of adaptation in the  
636 human genome. bioRxiv preprint.
- 637 Shapiro BJ, Alm EJ. 2008. Comparing patterns of natural selection across species using  
638 selective signatures. *Plos Genetics* 4(2).
- 639 Siepel A, Haussler D. 2005. Phylogenetic hidden Markov models. *Statistical methods in*  
640 *molecular evolution*. Springer. p. 325-351.
- 641 Spielman SJ, Wilke CO. 2015. Pyvolve: A Flexible Python Module for Simulating  
642 Sequences along Phylogenies. *PLoS One* 10(9):e0139047.
- 643 Stenson PD, Mort M, Ball EV, Howells K, Phillips AD, Thomas NST, Cooper DN. 2009.  
644 The Human Gene Mutation Database: 2008 update. *Genome Medicine* 1.
- 645 Stokowski RP, Pant PV, Dadd T, Fereday A, Hinds DA, Jarman C, Filsell W, Ginger RS,  
646 Green MR, van der Ouderaa FJ et al. 2007. A genomewide association study of skin  
647 pigmentation in a South Asian population. *Am J Hum Genet* 81(6):1119-32.
- 648 Tajima F. 1989. Statistical-Method for Testing the Neutral Mutation Hypothesis by DNA  
649 Polymorphism. *Genetics* 123(3):585-595.
- 650 Teshima KM, Coop G, Przeworski M. 2006. How reliable are empirical genomic scans for  
651 selective sweeps? *Genome Res* 16(6):702-12.
- 652 Thorleifsson G, Magnusson KP, Sulem P, Walters GB, Gudbjartsson DF, Stefansson H,

653 Jonsson T, Jonasdottir A, Jonasdottir A, Stefansdottir G et al. 2007. Common  
654 sequence variants in the LOXL1 gene confer susceptibility to exfoliation glaucoma.  
655 Science 317(5843):1397-400.

656 Timmann C, Thye T, Vens M, Evans J, May J, Ehmen C, Sievertsen J, Muntau B, Ruge G,  
657 Loag W et al. 2012. Genome-wide association study indicates two novel resistance  
658 loci for severe malaria. Nature 489(7416):443-6.

659 Vahdati AR, Wagner A. 2016. Parallel or convergent evolution in human population  
660 genomic data revealed by genotype networks. BMC Evol Biol 16:154.

661 Voight BF, Kudravalli S, Wen XQ, Pritchard JK. 2006. A map of recent positive selection  
662 in the human genome (vol 4, pg 154, 2006). Plos Biology 4(4):659-659.

663 Yang ZH, Bielawski JP. 2000. Statistical methods for detecting molecular adaptation.  
664 Trends in Ecology & Evolution 15(12):496-503.

665 Zhu Q, Ge D, Maia JM, Zhu M, Petrovski S, Dickson SP, Heinzen EL, Shianna KV,  
666 Goldstein DB. 2011. A genome-wide comparison of the functional properties of  
667 rare and common genetic variants in humans. Am J Hum Genet 88(4):458-68.  
668  
669

670 **Acknowledgements**

671 We thank Drs. Jody Hey, Rob Kulathinal, Joshua Shraiber, and Heather Rowe for their  
672 critical comments on previous versions of this manuscript. We would also like to thank  
673 Michael Li and Keith Davis for technical assistance. This work was funded by research  
674 grants from NIH (R01HG008146-01 and R01DK098242-04).

675

676 **Author Contributions**

677 S.K., L.B.S., and R.P. designed the research study, directed the analysis, and wrote the  
678 manuscript, A.P. designed one analysis, and contributed to the manuscript, T.R.L.  
679 conducted analyses, M.S. helped with data collection, web development, and analysis, and  
680 K.T., B.S.G., K.X., and J.T.D assisted with statistical analysis and contributed to the  
681 manuscript.

682

683 **Competing Financial Interests**

684 The authors declare no competing financial interests.



685 Figure Legends

686 **Figure 1 | Evolutionary Probability Approach.** The evolutionary probabilities (EPs) and  
687 their application to discover candidate adaptive polymorphisms (CAPs). **Panel a** displays  
688 a timetree of 46 vertebrates and lamprey, including 36 mammalian species, which was used  
689 along with alignments of orthologous amino acid sequences for all human proteins (Kent et  
690 al. 2002) to compute the probability of observing each amino acid residue at a given  
691 position. Under neutral theory, we expect a strong relationship between EP and allele  
692 frequency (AF) such that evolutionarily unexpected alleles ( $EP < 0.05$ ) will be rare. **Panel**  
693 **b** displays the relationship between EP and AF. Average EP (y-axis) was calculated for 0.05  
694 sized AF bins (x-axis) for all polymorphic missense alleles in the 1000 Genomes Project  
695 Phase 3 whole genome sequencing data, which confirms the general relationship between  
696 EP and AF to be consistent with neutral expectations. The standard deviation is visualized  
697 with grey lines (averages are in blue), which is expected to be large because contemporary  
698 AFs are a product of time of origin, natural selection, and genetic drift experienced by a  
699 mutation. **Panel c** displays the distribution of empirical  $P$  values ( $-\log_{10}$ ) generated from  
700 the empirical framework ( $AF | EP < 0.05$ ). The cutoff used to identify CAPs is shown with  
701 a dashed red line and is more extreme than a false positive rate of 0.05.

702

703 **Figure 2 | Chromosomal distribution of CAPs.** (a) The distribution of candidate adaptive  
704 alleles (CAPs) across autosomal chromosomes (red points). Chromosomal banding  
705 patterns are also visualized for reference. (b) A plot of  $-\log_{10}(P_{\text{neu}})$  generated from the  
706 Evolutionary Probability Approach (y-axis) against chromosome position (x-axis) for the  
707 MHC region of chromosome 6. CAPs are shaded red and non-CAPs are shaded grey. The  
708 CAP  $P_{\text{neu}}$  cutoff is shown with a dashed red line. Notable HLA genes with more than 20  
709 CAPs are indicated.

710

711 **Figure 3 | Properties of candidate adaptive alleles.** (a) Distribution of all (red bars) and  
712 phenotype-associated (pink bars) CAP counts across proteins. (b) Biological processes that  
713 are significantly enriched for CAPs after Bonferonni correction for multiple testing. The  
714 y-axis displays GO-slim biological process category names, and the x-axis displays the  
715 number of CAPs annotated to a given GO-slim biological process category. Several

716 categories were significantly enriched with a fold enrichment  $> 1.5$  (**Supplementary Table**  
717 **1**).

718

719 **Figure 4 | Selection model fits to observed CAPs.** Site frequency spectra (SFS) for SNPs  
720 with AF  $> 5\%$ . Site frequency spectra (SFS) were *scaled* to have the same number of sites  
721 for AF  $> 5\%$ . Black bars represent all EP  $< 0.05$  alleles observed in 1000G Phase 3  
722 individuals. **(a)** Observed and fitted SFS for all candidate adaptive polymorphisms (CAPs).  
723 A neutral model (blue) does not explain the preponderance of alleles found at very high AF,  
724 and does not fit the observed data well ( $\ln L = -4,124$ ) **(b)** Observed and fitted SFS for all  
725 CAPs. A model with weakly deleterious (purple) and beneficial (green) showed the best fit  
726 ( $\ln L = -3,080$ ). It was significantly better than any other combination of models (LRT  $P \ll$   
727  $10^{-10}$ ). All CAP alleles shared with great apes (5%) were excluded from observed SFS.

728

729 Tables

Table 1. Known adaptive missense polymorphisms and their candidate adaptive polymorphism (CAP) status with empirical probability ( $P_{\text{neu}}$ ).

| Protein | SNP Identifier | CAP?     | <i>P</i> -value |
|---------|----------------|----------|-----------------|
| ALMS1   | rs10193972     | yes      | < 0.02          |
|         | rs2056486      | yes      | < 0.02          |
|         | rs3813227      | yes      | < 0.02          |
|         | rs6546837      | yes      | < 0.02          |
|         | rs6546838      | yes      | < 0.02          |
|         | rs6546839      | yes      | < 0.02          |
|         | rs6724782      | yes      | < 0.02          |
| APOL1   | rs73885319     | no       | n/a             |
| DARC    | rs12075        | yes      | < 0.02          |
| EDAR    | rs3827760      | yes      | < 0.03          |
| G6PD    | rs1050828      | marginal | n/a             |
|         | rs1050829      | yes      | < 0.03          |
| HBB     | rs334          | marginal | n/a             |
|         | rs1805007      | no       | n/a             |
| MC1R    | rs1805008      | no       | n/a             |
|         | rs885479       | yes      | < 0.03          |
| SLC24A5 | rs1426654      | yes      | < 0.02          |
| SLC45A2 | rs16891982     | yes      | < 0.02          |
| TLR4    | rs4986790      | yes      | < 0.04          |
|         | rs4986791      | marginal | n/a             |
| TLR5    | rs5744174      | no       | n/a             |
| TRPV6   | rs4987657      | yes      | < 0.01          |
|         | rs4987667      | yes      | < 0.01          |
|         | rs4987682      | yes      | < 0.01          |

*Note.* A candidate adaptive polymorphism (CAP) is an amino acid polymorphism with the evolutionary probability (EP) < 0.05 and population allele frequency (AF) > 5%. n/a marks alleles for which at least one of these two conditions was not met. **Supplementary Table 2** presents more details on each of these polymorphisms and the source references. Marginal status is given to alleles with EP < 0.05 and global AF > 2%.

730

731  
732  
733  
734  
735  
736

Figures

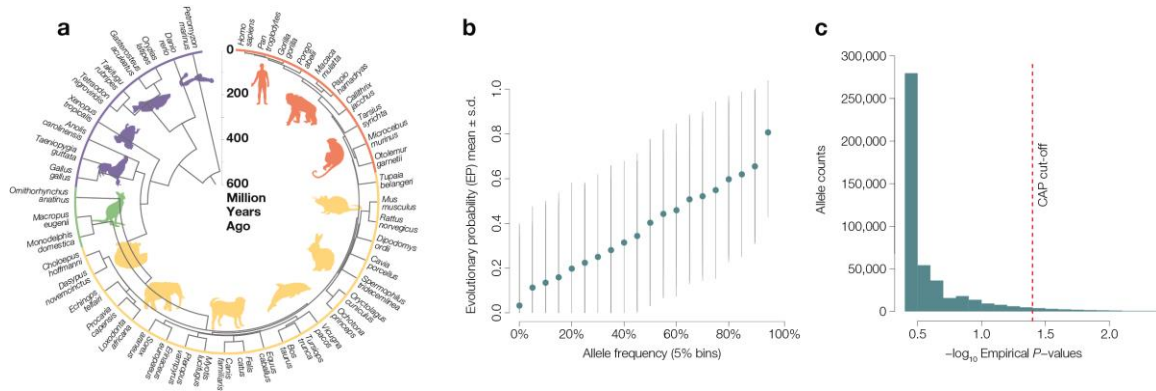

737  
738  
739  
740  
741  
742  
743  
744  
745  
746

**Figure 1**

747  
748  
749  
750  
751  
752  
753  
754

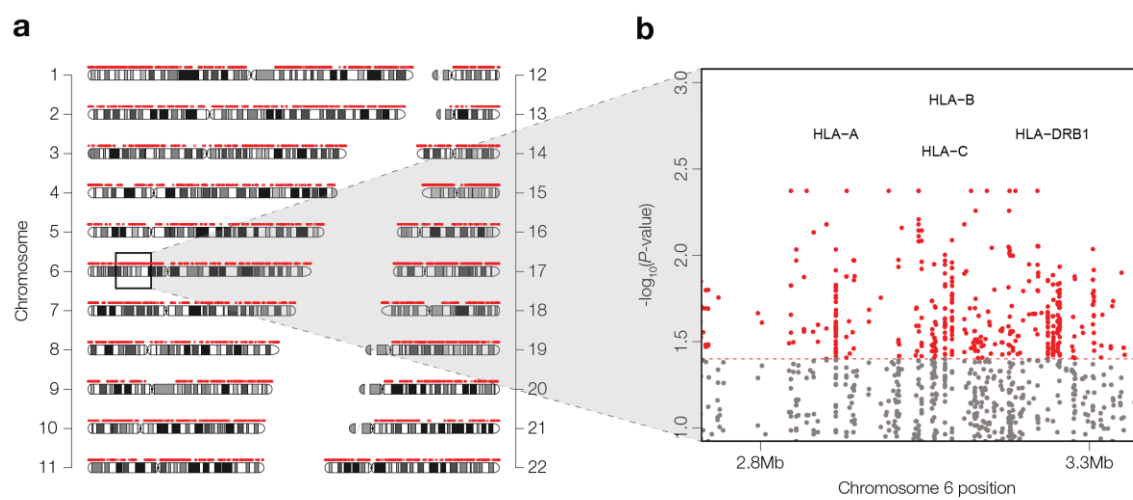

755  
756  
757  
758

**Figure 2**

759  
760  
761  
762  
763  
764  
765  
766  
767

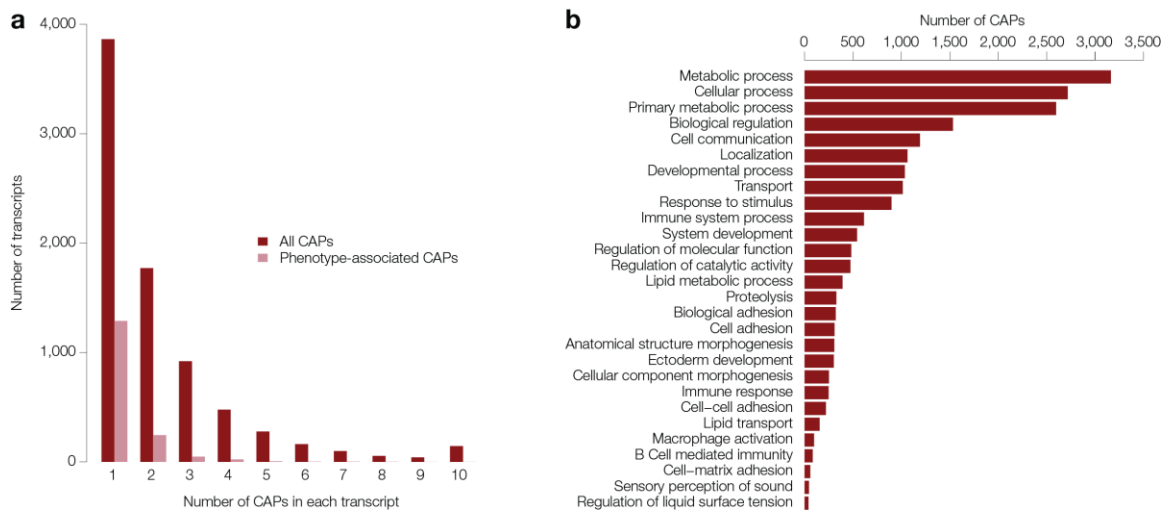

768  
769  
770  
771  
772

**Figure 3**

773  
774  
775  
776  
777  
778  
779  
780

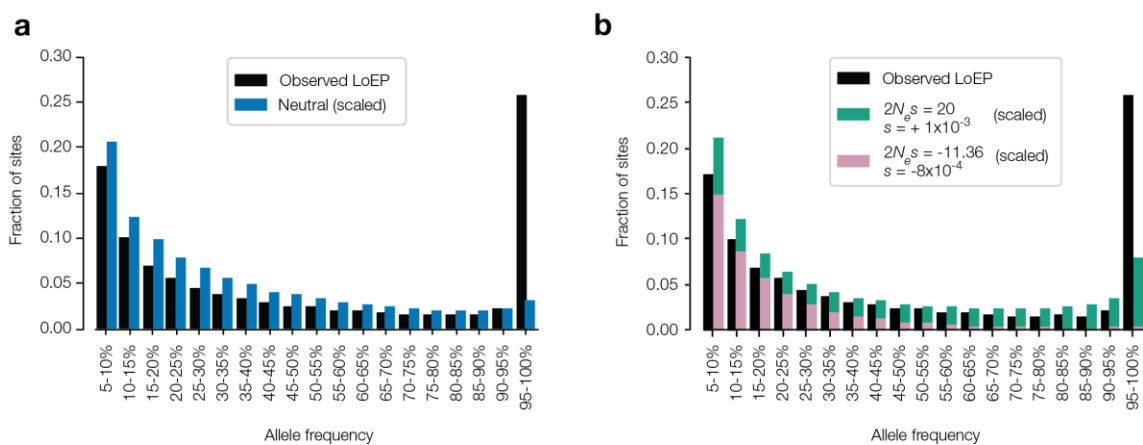

781  
782  
783  
784  
785  
786  
787

**Figure 4**
